# Supplementary material for: Integrated platform for operating and interrogating organs-on-chips
Source: Royal Society of Chemistry journal article supplement (doi:10.1039/c9ay01663e), 2019-01-01
Supplement: c9ay01663e2.pdf [file c9ay01663e2.pdf]

| Part<br>XY Stage                 | Description                                                                                    | Supplier Part #      | Supplier            | Quantity | Size | Price       | Units | Unit Price  |
|----------------------------------|------------------------------------------------------------------------------------------------|----------------------|---------------------|----------|------|-------------|-------|-------------|
| Stepper Motor                    | NEMA17 Stepper Motor Hybrid Bipolar 12V                                                        | 1568-1105-ND         | Digikey             | 1        | each | \$ 14.95    | 2     | \$ 29.90    |
| Motor Bracket                    | 3PCS Alloy Steel L Bracket for Nema 17                                                         |                      | Amazon              | 3        | pack | \$ 10.99    | 2     | \$ 7.33     |
| Shaft Coupler                    | FYSETC Coupler 5mm to 8mm Nema 17 Motor Shaft                                                  | Coupler 5-8mm        | Amazon              | 1        | each | \$ 10.99    | 2     | \$ 21.98    |
| Lead Screw                       | Ultra-Precision, Alloy Steel, M8 x 1.5mm Thread, 300mm Long                                    | 7549K57              | McMaster            | 1        | each | \$ 71.05    | 2     | \$ 142.10   |
| Nut                              | Acetal Plastic M8 x 1.5mm Pitch Flange Nut                                                     | 7549K64              | McMaster            | 5        | pack | \$ 14.48    | 2     | \$ 5.79     |
| Rail                             | Carriage Guide Rail (250 mm)                                                                   | 9867K124             | McMaster            | 1        | each | \$ 17.50    | 2     | \$ 35.00    |
| Rail                             | Carriage Guide Rail (500 mm)                                                                   | 9867K122             | McMaster            | 1        | each | \$ 35.00    | 1     | \$ 35.00    |
| Carriage                         | Sleeve Bearing Carriage for 15 mm Wide Rail, 47 mm Wide                                        | 9867K2               | McMaster            | 1        | each | \$ 51.11    | 3     | \$ 153.33   |
| Limit Switch                     | Precision Snap Acting Switch                                                                   | 480-2324-ND          | Digikey             | 1        | each | \$ 9.36     | 2     | \$ 18.72    |
| <b>Power Supply Circuits</b>     |                                                                                                |                      |                     |          |      |             |       |             |
| Power Supply                     | AC/DC Desktop Adapter 24V 160W                                                                 | 1866-2047-ND         | Digikey             | 1        | each | \$ 59.66    | 1     | \$ 59.66    |
| Power Port                       | 4 (Power) Position Circular Connector Jack                                                     | 2092-KPIX-PM-4S-S-ND | Digikey             | 1        | each | \$ 2.64     | 1     | \$ 2.64     |
| Barrel Connector                 | Power Barrel Connector Plug 2.5X5.5MM                                                          | CP3-1001-ND          | Digikey             | 1        | each | \$ 1.04     | 1     | \$ 1.04     |
| Converter                        | DC DC CONVERTER 12V 12W                                                                        | 1951-2251-ND         | Digikey             | 1        | each | \$ 37.30    | 1     | \$ 37.30    |
| Converter                        | DC DC CONVERTER 5V 7.5W                                                                        | 1951-2714-ND         | Digikey             | 1        | each | \$ 30.30    | 1     | \$ 30.30    |
| Power Switch                     | Rocker Switch SPST 20A (AC/DC) 250V Panel Mount, Snap-In                                       | 1091-1139-ND         | Digikey             | 1        | each | \$ 4.02     | 1     | \$ 4.02     |
| Relay                            | RELAY GEN PURPOSE DPDT 5A 24V                                                                  | 255-1118-ND          | Digikey             | 1        | each | \$ 3.94     | 1     | \$ 3.94     |
| Transistor                       | Bipolar (BJT) Transistor NPN 40V 200mA 300MHz 625mW                                            | 2N3904FS-ND          | Digikey             | 1        | each | \$ 0.21     | 3     | \$ 0.63     |
| Diode                            | DIODE GEN PURP 250MA SOD323                                                                    | BAS316RRGCT-ND       | Digikey             | 1        | each | \$ 0.11     | 1     | \$ 0.11     |
| OpAmp                            | IC OPAMP GP 1MHZ 8DIP                                                                          | LM358NNS/NOPB-ND     | Digikey             | 1        | each | \$ 0.84     | 1     | \$ 0.84     |
| Resistor                         | RES 0.1 OHM 20W 1% TO220                                                                       | PWR220T-20-R100F-ND  | Digikey             | 1        | each | \$ 4.20     | 1     | \$ 4.20     |
| Resistor                         | RES 1K OHM 1% 1/2W 1206                                                                        | RNCP1206FTD10K0CT-ND | Digikey             | 1        | each | \$ 0.10     | 2     | \$ 0.20     |
| Resistor                         | RES 10K OHM 1% 1/2W 1206                                                                       | RNCP1206FTD10K0CT-ND | Digikey             | 1        | each | \$ 0.10     | 4     | \$ 0.40     |
| Resistor                         | RES SMD 100K OHM 0.1% 1/4W 1206                                                                | P100KBCT-ND          | Digikey             | 1        | each | \$ 0.54     | 3     | \$ 1.62     |
| Resistor                         | RES SMD 100 OHM 0.1% 1/4W 1206                                                                 | P100BCT-ND           | Digikey             | 1        | each | \$ 0.10     | 1     | \$ 0.10     |
| Resistor                         | RES SMD 50 OHM 5% 2.4W 1206                                                                    | 541-2477-1-ND        | Digikey             | 1        | each | \$ 0.59     | 3     | \$ 1.77     |
| Resistor                         | RES SMD 5K OHM 0.1% 1/4W 1206                                                                  | YAG5090CT-ND         | Digikey             | 1        | each | \$ 0.10     | 1     | \$ 0.10     |
| LED                              | LED GREEN CLEAR 1206 SMD                                                                       | 160-1404-1-ND        | Digikey             | 1        | each | \$ 0.25     | 1     | \$ 0.25     |
| Transistor                       | TRANS NPN 40V 0.2A TO-92                                                                       | 2N3904FS-ND          | Digikey             | 1        | each | \$ 0.21     | 1     | \$ 0.21     |
| Thyristor                        | SCR 0.8A 200V TO-92                                                                            | 2N5064CS-ND          | Digikey             | 1        | each | \$ 0.62     | 1     | \$ 0.62     |
| Jumper Wires                     | JUMPER WIRE M TO M 3' 28AWG                                                                    | 1528-1966-ND         | Digikey             | 20       | pack | \$ 1.95     | 27    | \$ 2.63     |
| Wire Connector                   | Socket Contact Gold 24-30 AWG Crimp                                                            | WM1128CT-ND          | Digikey             | 2        | each | \$ 0.18     | 1     | \$ 0.18     |
| Wire Connector                   | 10CKT CRIMP RCPT HOU W/LOCKING                                                                 | WM3341-ND            | Digikey             | 1        | each | \$ 0.49     | 1     | \$ 0.49     |
| Wire Connector                   | CONN HOUSING 2POS .100 W/LATCH                                                                 | WM2900-ND            | Digikey             | 1        | each | \$ 0.27     | 1     | \$ 0.27     |
| Wire Connector                   | CONN SOCKET 24-30AWG CRIMP TIN                                                                 | WM2562CT-ND          | Digikey             | 1        | each | \$ 0.11     | 4     | \$ 0.44     |
| Printed Circuit Board            | Custom PCB for Power Distribution and Over-current Protection                                  |                      | OSH Park            | 3        | set  | \$ 38.65    | 1     | \$ 12.88    |
| <b>Communication Electronics</b> |                                                                                                |                      |                     |          |      |             |       |             |
| USB Hub                          | D-Link® DUB-H7 USB Hub, 7 Port                                                                 | 773207               | Staples             | 1        | each | \$ 35.99    | 1     | \$ 35.99    |
| USB Port                         | Adapter Connector USB-B, Receptacle To USB-A, Receptacle                                       | SAM8637-ND           | Digikey             | 1        | each | \$ 8.74     | 1     | \$ 8.74     |
| USB Cable                        | USB 2.0 Cable A Male to B Male 1.64' (500.0mm) Shielded                                        | A128023-ND           | Digikey             | 1        | each | \$ 8.28     | 1     | \$ 8.28     |
| USB Cable                        | USB 2.0 Cable A Male to B Male 0.52' (160.0mm) Shielded                                        | A142582-ND           | Digikey             | 1        | each | \$ 5.77     | 1     | \$ 5.77     |
| USB Cable                        | CABLE USB 2.0 A-MINI A M-M 1'                                                                  | 380-1427-ND          | Digikey             | 1        | each | \$ 3.03     | 2     | \$ 6.06     |
| USB Serial Converter             | MOD USB SERIAL 5V EMBEDDED PCB                                                                 | 768-1017-ND          | Digikey             | 1        | each | \$ 15.63    | 1     | \$ 15.63    |
| USB Cable                        | Male A to Male B Usb Cable - 2m                                                                | WM17103-ND           | Digikey             | 1        | each | \$ 3.28     | 1     | \$ 3.28     |
| Microcontroller                  | Arduino MEGA2560 (ATMEGA2560)                                                                  | 1050-1018-ND         | Digikey             | 1        | each | \$ 38.50    | 1     | \$ 38.50    |
| Driver                           | Adafruit MotorShield Kit V2.3                                                                  | 1528-1187-ND         | Digikey             | 1        | each | \$ 19.95    | 1     | \$ 19.95    |
| Driver                           | CoolDrive® ONE Single Valve Driver                                                             | 161D1X1K0            | Nresearch           | 1        | each | \$ 19.50    | 3     | \$ 58.50    |
| <b>Fluidic Components</b>        |                                                                                                |                      |                     |          |      |             |       |             |
| Pump                             | Ismatec OEM REGLO ICC Digital Peristaltic Panel Mount Pump; 3-Channel, 8-Roller                | EW-78001-45          | Cole-Parmer         | 1        | each | \$ 1,809.00 | 1     | \$ 1,809.00 |
| Valve                            | TitanEX™ 10 Position/11 Port With PCB (IDEX-HS; MLP778-606)                                    | 00420MV              | Cole-Parmer         | 1        | each | \$ 983.18   | 1     | \$ 983.18   |
| Valve                            | PEEK Manifold Assembly 5 Port, for 1/16" OD (IDEX-HS; P-154)                                   | 02023-10             | Cole-Parmer         | 1        | each | \$ 104.40   | 1     | \$ 104.40   |
| Valve                            | 3-way Isolation Standard, 24VDC; 10-32 Porting                                                 | HP 161T032           | Nresearch           | 1        | each | \$ 73.48    | 3     | \$ 220.44   |
| Tubing Connector                 | Peristaltic Pump Clips                                                                         | EW-78016-98          | Cole-Parmer         | 1        | each | \$ 58.00    | 3     | \$ 174.00   |
| Tubing Connector                 | Two Piece Fitting Sets for 3-way Valves (set of 10)                                            | 10239109-10          | Nresearch           | 10       | pack | \$ 31.09    | 9     | \$ 27.98    |
| Tubing Connector                 | One-Piece Fingertight 10-32 Coned, for 1/16" OD (IDEX-HS; F-120X)                              | 02013-41             | Cole-Parmer         | 10       | pack | \$ 56.66    | 6     | \$ 34.00    |
| Tubing Connector                 | Conical Adapter Assembly, for Rigid Tubing to Soft Tubing (IDEX-HS; P-794)                     | 02014-54             | Cole-Parmer         | 1        | each | \$ 19.80    | 6     | \$ 118.80   |
| Tubing Connector                 | Flangeless Fitting Blue Delrin®, 1/4-28 Flat-Bottom, for 1/16" OD (IDEX-HS; XP-206)            | EW-00414-LW          | Cole-Parmer         | 25       | pack | \$ 55.77    | 6     | \$ 13.38    |
| Tubing                           | Ismatec SC0053T 3-Stop LMT-55 Tubing, 0.51mm ID, 12/pk                                         | EW-97619-18          | Cole-Parmer         | 12       | pack | \$ 88.40    | 3     | \$ 22.10    |
| Tubing                           | Idex 1527L Chromatography Tubing, Natural FEP, 1/16" OD x 0.010" ID x 50 ft L                  | EW-02015-05          | Cole-Parmer         | 50       | feet | \$ 113.00   |       | \$ -        |
| <b>Screws</b>                    |                                                                                                |                      |                     |          |      |             |       |             |
| Screws                           | 18-8 Stainless Steel Low-Profile Socket Head Screws; M3 x 0.5 mm Thread, 6 mm Long             | 92855A307            | McMaster            | 25       | pack | \$ 5.75     |       | \$ -        |
| Screws                           | 18-8 Stainless Steel Low-Profile Socket Head Screws; M3 x 0.5 mm Thread, 10 mm Long            | 92855A310            | McMaster            | 25       | pack | \$ 2.63     |       | \$ -        |
| Screws                           | 18-8 Stainless Steel Low-Profile Socket Head Screws; M3 x 0.5 mm Thread, 16 mm Long            | 92855A316            | McMaster            | 25       | pack | \$ 3.20     |       | \$ -        |
| Screws                           | 18-8 Stainless Steel Low-Profile Socket Head Screws; M4 x 0.7 mm Thread, 16 mm Long            | 92855A416            | McMaster            | 25       | pack | \$ 4.22     |       | \$ -        |
| Screws                           | 18-8 Stainless Steel Low-Profile Socket Head Screws; M5 x 0.8 mm Thread, 10 mm Long            | 92855A510            | McMaster            | 50       | pack | \$ 12.72    |       | \$ -        |
| Screws                           | Alloy Steel Low-Profile Socket Head Screw; Black Oxide, 2-56 Thread Size, 0.25" Long (2Switch) | 92220A311            | McMaster            | 10       | pack | \$ 14.80    |       | \$ -        |
| Screws                           | Alloy Steel Low-Profile Socket Head Screw; Black-Oxide, 4-40 Thread Size, 1/2" Long (MSwitch)  | 92220A123            | McMaster            | 10       | pack | \$ 7.93     |       | \$ -        |
| Screws                           | Passivated 18-8 Stainless Steel Pan Head Phillips Screws; M2.5 x 0.45mm Thread, 10mm Long      | 92000A106            | McMaster            | 100      | pack | \$ 4.03     |       | \$ -        |
| Nut                              | High-Strength Steel Hex Nut; Class 10, M3 x 0.5 mm Thread                                      | 90685A037            | McMaster            | 25       | pack | \$ 8.49     |       | \$ -        |
| Nut                              | High-Strength Steel Hex Nut; Class 10, M4 x 0.7 mm Thread                                      | 90685A039            | McMaster            | 100      | pack | \$ 9.68     |       | \$ -        |
| Nut                              | Zinc-Plated Steel Hex Nut; Medium-Strength, Class 8, M2.5 x 0.45 mm Thread                     | 90591A270            | McMaster            | 100      | pack | \$ 2.22     |       | \$ -        |
| Bracket                          | Zinc-Plated Steel Corner Bracket, 7/8" x 7/8" x 5/8"                                           | 1556A24              | McMaster            | 1        | each | \$ 0.43     | 11    | \$ 4.73     |
| Standoff                         | Female Threaded Hex Standoff; 18-8 Stainless Steel, 16mm Hex, 16mm Long, M4 x 0.7mm Thread     | 94868A631            | McMaster            | 1        | each | \$ 2.09     | 8     | \$ 16.72    |
| Standoff                         | Rubber Bumper with Unthreaded Hole                                                             | 9540K743             | McMaster            | 10       | pack | \$ 6.93     |       | \$ -        |
| <b>PML Fluidic Chip</b>          |                                                                                                |                      |                     |          |      |             |       |             |
| Chip Holder                      | Fluidic Connect PRO Chip Holder with 4515 Inserts                                              | FC_PRO_CH4515        | Micronit            | 1        | each | \$ 1,530.00 | 1     | \$ 1,530.00 |
| Ferrules                         | 5 Fluidic PRO Ferrules                                                                         | FC_PRO_FFKM_KIT.05   | Micronit            | 5        | pack | \$ 113.00   | 6     | \$ 135.60   |
| Debubbler                        | Debubbler                                                                                      |                      | DarwinMicrofluidics | 1        | each | \$ 149.00   | 3     | \$ 447.00   |
| Chip                             | Fluidic Chip for Spheroid Culture and Interrogation                                            | FP-3W                | PMLab/Bio-Vitro     |          |      |             |       |             |
| <b>In-House Fabrication</b>      |                                                                                                |                      |                     |          |      |             |       |             |
| Acrylic                          | Clear Scratch- and UV-Resistant Cast Acrylic Sheet; 12" x 24" x 1/4"                           | 8560K355             | McMaster            | 1        | each | \$ 29.77    |       |             |

**Supplemental Table 1:** Complete part list and price breakdown. The total cost of materials is roughly \$6,500.
